# Supplementary material for: Development and investigation of metabolism-associated risk assessment models for patients with viral hepatitis
Source: Front Cell Infect Microbiol. 2023 Mar 29;13:1165647. doi: 10.3389/fcimb.2023.1165647 (PMC10095836; doi:10.3389/fcimb.2023.1165647)
Supplement: Supplementary Table 2 — Names and corresponding risk assessment results of 96 metabolic pathways associated with risk of liver dysfunction and hepatocellular carcinogenesis in Cohort 2. [file Table_2.xlsx]

## Sheet: Sheet1
96 metabolic pathways' names and corresponding risk assessment results
96 metabolic pathways associated with child, decomp, and hcc in Cohort2	event: child		event: decomp		event: hcc
	Hazard Ratio	p value	Hazard Ratio	p value	Hazard Ratio	p value
WP_OXIDATION_BY_CYTOCHROME_P450	0.72	0	0.81	0.0001	0.79	0
WP_NICOTINE_METABOLISM_IN_LIVER_CELLS	0.91	0	0.9	0	0.95	0.0285
WP_LIPID_PARTICLES_COMPOSITION	0.84	0	0.9	0.0101	0.89	0.0053
WP_FATTY_ACID_OMEGAOXIDATION	0.78	0	0.88	0.0068	0.85	0.0007
WP_CYSTEINE_AND_METHIONINE_CATABOLISM	0.89	0	0.93	0.0095	0.93	0.019
REACTOME_SULFUR_AMINO_ACID_METABOLISM	0.84	0	0.88	0.0025	0.92	0.0377
REACTOME_METABOLISM_OF_STEROIDS	0.72	0	0.8	0.0053	0.77	0.0009
REACTOME_METABOLIC_DISORDERS_OF_BIOLOGICAL_OXIDATION_ENZYMES	0.84	0	0.86	0.0005	0.88	0.002
REACTOME_BIOLOGICAL_OXIDATIONS	0.71	0	0.81	0.002	0.78	0.0001
KEGG_STEROID_HORMONE_BIOSYNTHESIS	0.8	0	0.85	0.001	0.89	0.0178
KEGG_RETINOL_METABOLISM	0.77	0	0.85	0.0009	0.83	0.0004
KEGG_PRIMARY_BILE_ACID_BIOSYNTHESIS	0.8	0	0.84	0.0001	0.87	0.0022
GOBP_VITAMIN_K_METABOLIC_PROCESS	0.89	0	0.92	0.0021	0.92	0.0022
GOBP_VITAMIN_CATABOLIC_PROCESS	0.82	0	0.86	0.0003	0.89	0.0035
GOBP_TERPENOID_METABOLIC_PROCESS	0.7	0	0.84	0.0238	0.81	0.0045
GOBP_STEROID_METABOLIC_PROCESS	0.65	0	0.77	0.0055	0.71	0.0002
GOBP_STEROID_CATABOLIC_PROCESS	0.83	0	0.87	0.0012	0.86	0.0003
GOBP_STEROID_BIOSYNTHETIC_PROCESS	0.68	0	0.77	0.0032	0.77	0.0049
GOBP_SMALL_MOLECULE_CATABOLIC_PROCESS	0.76	0	0.81	0.0022	0.84	0.0109
GOBP_RETINOL_METABOLIC_PROCESS	0.7	0	0.86	0.0134	0.84	0.0078
GOBP_QUINONE_CATABOLIC_PROCESS	0.91	0	0.93	0.0006	0.94	0.0031
GOBP_ORGANIC_ACID_CATABOLIC_PROCESS	0.8	0	0.84	0.0009	0.86	0.0041
GOBP_OLEFINIC_COMPOUND_METABOLIC_PROCESS	0.63	0	0.79	0.0151	0.73	0.0014
GOBP_MONOCARBOXYLIC_ACID_METABOLIC_PROCESS	0.69	0	0.76	0.0013	0.78	0.0034
GOBP_MONOCARBOXYLIC_ACID_CATABOLIC_PROCESS	0.79	0	0.84	0.0004	0.86	0.0026
GOBP_MENAQUINONE_METABOLIC_PROCESS	0.9	0	0.92	0.0016	0.93	0.0007
GOBP_LIPID_OXIDATION	0.79	0	0.86	0.0075	0.84	0.0023
GOBP_LIPID_CATABOLIC_PROCESS	0.63	0	0.73	0.001	0.77	0.0075
GOBP_LEUKOTRIENE_B4_CATABOLIC_PROCESS	0.93	0	0.95	0.0102	0.95	0.0039
GOBP_ISOPRENOID_METABOLIC_PROCESS	0.68	0	0.83	0.0265	0.77	0.0012
GOBP_ICOSANOID_CATABOLIC_PROCESS	0.89	0	0.93	0.0049	0.93	0.007
GOBP_HORMONE_METABOLIC_PROCESS	0.63	0	0.75	0.0034	0.76	0.005
GOBP_FATTY_ACID_CATABOLIC_PROCESS	0.8	0	0.85	0.002	0.86	0.0069
GOBP_FATTY_ACID_BETA_OXIDATION_USING_ACYL_COA_DEHYDROGENASE	0.88	0	0.92	0.0082	0.93	0.0193
GOBP_FATTY_ACID_BETA_OXIDATION	0.81	0	0.86	0.0023	0.89	0.0168
GOBP_FAT_SOLUBLE_VITAMIN_CATABOLIC_PROCESS	0.84	0	0.88	0.0002	0.9	0.0017
GOBP_ESTROGEN_METABOLIC_PROCESS	0.8	0	0.9	0.0315	0.85	0.002
GOBP_EPOXYGENASE_P450_PATHWAY	0.82	0	0.89	0.0055	0.86	0.0002
GOBP_CELLULAR_LIPID_CATABOLIC_PROCESS	0.7	0	0.76	0.002	0.8	0.0123
GOBP_CELLULAR_HORMONE_METABOLIC_PROCESS	0.65	0	0.82	0.0183	0.8	0.0072
GOBP_AMINO_ACID_BETAINE_METABOLIC_PROCESS	0.86	0	0.89	0.0009	0.9	0.0062
WP_EICOSANOID_METABOLISM_VIA_CYTOCHROME_P450_MONOOXYGENASES_PATHWAY	0.91	0.0001	0.94	0.0188	0.94	0.0218
GOBP_WATER_SOLUBLE_VITAMIN_BIOSYNTHETIC_PROCESS	0.92	0.0001	0.95	0.0102	0.95	0.022
GOBP_ORGANIC_ACID_METABOLIC_PROCESS	0.74	0.0001	0.77	0.0016	0.81	0.007
GOBP_GAMMA_AMINOBUTYRIC_ACID_METABOLIC_PROCESS	0.91	0.0001	0.94	0.0188	0.93	0.0009
GOBP_FATTY_ACID_METABOLIC_PROCESS	0.71	0.0001	0.77	0.0035	0.79	0.0101
GOBP_ENERGY_RESERVE_METABOLIC_PROCESS	0.73	0.0001	0.85	0.0287	0.84	0.0253
GOBP_DERMATAN_SULFATE_METABOLIC_PROCESS	1.07	0.0001	1.06	0.0006	1.04	0.0162
GOBP_DERMATAN_SULFATE_BIOSYNTHETIC_PROCESS	1.06	0.0001	1.05	0.0005	1.05	0.0008
GOBP_CELLULAR_KETONE_METABOLIC_PROCESS	0.7	0.0001	0.78	0.0056	0.82	0.029
GOBP_CELLULAR_AMINO_ACID_CATABOLIC_PROCESS	0.85	0.0001	0.88	0.0058	0.9	0.0253
REACTOME_METABOLISM_OF_AMINO_ACIDS_AND_DERIVATIVES	0.77	0.0002	0.82	0.01	0.86	0.041
REACTOME_FRUCTOSE_CATABOLISM	0.88	0.0002	0.93	0.0305	0.92	0.0152
REACTOME_FATTY_ACIDS	0.9	0.0002	0.92	0.006	0.9	0.0003
GOBP_SULFUR_AMINO_ACID_METABOLIC_PROCESS	0.88	0.0002	0.91	0.0093	0.93	0.0434
GOBP_STEROL_METABOLIC_PROCESS	0.75	0.0002	0.84	0.0359	0.77	0.0005
GOBP_LIPID_HOMEOSTASIS	0.73	0.0002	0.84	0.0441	0.83	0.025
GOBP_LEUKOTRIENE_B4_METABOLIC_PROCESS	0.93	0.0002	0.94	0.0042	0.96	0.0244
GOBP_KETONE_CATABOLIC_PROCESS	0.87	0.0002	0.88	0.0003	0.89	0.0023
GOBP_DERMATAN_SULFATE_PROTEOGLYCAN_METABOLIC_PROCESS	1.08	0.0002	1.06	0.0032	1.04	0.0265
GOBP_AMINO_ACID_BETAINE_BIOSYNTHETIC_PROCESS	0.94	0.0002	0.95	0.0091	0.96	0.0256
GOBP_ALKALOID_METABOLIC_PROCESS	0.9	0.0002	0.94	0.017	0.91	0.0008
GOBP_LIPID_MODIFICATION	0.74	0.0003	0.8	0.0047	0.78	0.0035
WP_BIOMARKERS_FOR_UREA_CYCLE_DISORDERS	0.88	0.0004	0.88	0.0001	0.9	0.003
GOBP_SMALL_MOLECULE_METABOLIC_PROCESS	0.71	0.0005	0.79	0.0198	0.79	0.0215
GOBP_ALPHA_AMINO_ACID_CATABOLIC_PROCESS	0.86	0.0006	0.88	0.0039	0.91	0.03
REACTOME_COLLAGEN_DEGRADATION	1.19	0.0007	1.11	0.0427	1.1	0.0491
GOBP_REGULATION_OF_LIPID_KINASE_ACTIVITY	1.2	0.0008	1.12	0.0278	1.13	0.0261
GOBP_CELLULAR_LIPID_METABOLIC_PROCESS	0.63	0.0009	0.73	0.0213	0.75	0.0385
GOBP_ORGANIC_ACID_BIOSYNTHETIC_PROCESS	0.77	0.001	0.83	0.0195	0.81	0.0105
GOBP_MONOCARBOXYLIC_ACID_BIOSYNTHETIC_PROCESS	0.74	0.001	0.82	0.0251	0.82	0.0302
GOBP_CARNITINE_METABOLIC_PROCESS	0.89	0.001	0.91	0.004	0.92	0.0232
GOBP_ALPHA_AMINO_ACID_METABOLIC_PROCESS	0.84	0.001	0.87	0.0091	0.88	0.0122
REACTOME_PEROXISOMAL_LIPID_METABOLISM	0.91	0.0011	0.94	0.0493	0.92	0.0099
GOBP_LONG_CHAIN_FATTY_ACID_METABOLIC_PROCESS	0.76	0.0011	0.84	0.0284	0.8	0.0048
GOBP_CELLULAR_AMINO_ACID_METABOLIC_PROCESS	0.84	0.0013	0.85	0.0073	0.89	0.0319
GOBP_LIPID_METABOLIC_PROCESS	0.64	0.0014	0.73	0.0332	0.72	0.0169
WP_SERINE_METABOLISM	0.93	0.0018	0.93	0.0007	0.95	0.0328
GOBP_SERINE_FAMILY_AMINO_ACID_METABOLIC_PROCESS	0.91	0.0019	0.92	0.0068	0.94	0.0254
KEGG_BETA_ALANINE_METABOLISM	0.92	0.0025	0.94	0.0429	0.94	0.037
GOBP_BILE_ACID_BIOSYNTHETIC_PROCESS	0.85	0.003	0.88	0.0178	0.86	0.0082
KEGG_ALANINE_ASPARTATE_AND_GLUTAMATE_METABOLISM	0.85	0.0036	0.87	0.0161	0.88	0.0244
GOBP_LIPID_HYDROXYLATION	0.92	0.0037	0.93	0.0088	0.92	0.0059
GOBP_URATE_METABOLIC_PROCESS	0.94	0.0047	0.95	0.0118	0.94	0.0011
GOBP_ARACHIDONIC_ACID_METABOLIC_PROCESS	0.8	0.0047	0.85	0.0395	0.82	0.0107
WP_TCA_CYCLE_AND_DEFICIENCY_OF_PYRUVATE_DEHYDROGENASE_COMPLEX_PDHC	0.91	0.0067	0.93	0.0342	0.91	0.0057
KEGG_VALINE_LEUCINE_AND_ISOLEUCINE_DEGRADATION	0.92	0.007	0.94	0.0385	0.93	0.0126
GOBP_N_ACETYLNEURAMINATE_CATABOLIC_PROCESS	0.74	0.0073	0.8	0.0336	0.79	0.0311
REACTOME_DERMATAN_SULFATE_BIOSYNTHESIS	1.07	0.0078	1.05	0.0253	1.06	0.0205
WP_ALANINE_AND_ASPARTATE_METABOLISM	0.88	0.0095	0.9	0.033	0.91	0.0494
REACTOME_DISEASES_OF_CARBOHYDRATE_METABOLISM	0.87	0.011	0.87	0.0053	0.85	0.0018
REACTOME_BILE_ACID_AND_BILE_SALT_METABOLISM	0.87	0.012	0.88	0.0137	0.89	0.0244
GOBP_GANGLIOSIDE_BIOSYNTHETIC_PROCESS_VIA_LACTOSYLCERAMIDE	0.95	0.0158	0.95	0.0272	0.95	0.0098
GOBP_ALANINE_CATABOLIC_PROCESS	0.95	0.0268	0.93	0.0015	0.95	0.0148
GOBP_MODIFIED_AMINO_ACID_TRANSPORT	1.12	0.0306	1.13	0.0133	1.14	0.0134
GOBP_CHOLESTEROL_CATABOLIC_PROCESS	0.94	0.0339	0.95	0.0456	0.94	0.0245
